# Supplementary material
Source: publisher figshare collection journal article supplement (https://acs.figshare.com/ndownloader/files/3601371)
Supplement: Supplementary file 1 [file 3601371]

## Sheet: 350^550^1000
Supplementary Table S5
Overrepresented GO from the PS differentially regulated by 350, 550 and 1000 µM VPA (compared to untreated control) were determinded (see Tab. S2 for all concentrations) and the overlap between the concentrations were calculated as displayed in the Venn diagrams of Fig. 4A and B. For each overlap a single sheet is given that comprises the oGOs from up- and down-regulated PS. The ID gives the iden…
up-regulated PS				down-regulated PS
350 ^ 550 ^ 1000				350 ^ 550 ^ 1000
ID	term	key biological process		ID	term	key biological process
GO:0034332	adherens junction organization	general cellular function		GO:0045944	positive regulation of transcription from RNA polymerase II promoter	general cellular function
GO:0001525	angiogenesis	non-neuronal lineages		GO:0008406	gonad development	non-neuronal lineages
GO:0051216	cartilage development	non-neuronal lineages		GO:0007411	axon guidance	neuronal pathways
GO:0007155	cell adhesion	general cellular function		GO:0048663	neuron fate commitment	neuronal pathways
GO:0008283	cell proliferation	general cellular function
GO:0071229	cellular response to acid	stress pathways
GO:0071456	cellular response to hypoxia	stress pathways
GO:0071479	cellular response to ionizing radiation	stress pathways
GO:0071222	cellular response to lipopolysaccharide	stress pathways
GO:0071356	cellular response to tumor necrosis factor	general cellular function
GO:0030199	collagen fibril organization	general cellular function
GO:0050673	epithelial cell proliferation	non-neuronal lineages
GO:0001837	epithelial to mesenchymal transition	non-neuronal lineages
GO:0030198	extracellular matrix organization	general cellular function
GO:0010001	glial cell differentiation	non-neuronal lineages
GO:0015758	glucose transport	general cellular function
GO:0007156	homophilic cell adhesion	general cellular function
GO:0048839	inner ear development	non-neuronal lineages
GO:0042472	inner ear morphogenesis	non-neuronal lineages
GO:0050900	leukocyte migration	migration
GO:0043066	negative regulation of apoptotic process	apoptosis / death
GO:0090090	negative regulation of canonical Wnt receptor signaling pathway	general cellular function
GO:0008285	negative regulation of cell proliferation	general cellular function
GO:1901215	negative regulation of neuron death	apoptosis / death
GO:0000122	negative regulation of transcription from RNA polymerase II promoter	general cellular function
GO:0014032	neural crest cell development	neural crest
GO:0001764	neuron migration	migration
GO:0003151	outflow tract morphogenesis	non-neuronal lineages
GO:0007422	peripheral nervous system development	neuronal pathways
GO:0021983	pituitary gland development	non-neuronal lineages
GO:0030168	platelet activation	non-neuronal lineages
GO:0045766	positive regulation of angiogenesis	non-neuronal lineages
GO:0030335	positive regulation of cell migration	migration
GO:0008284	positive regulation of cell proliferation	general cellular function
GO:0010595	positive regulation of endothelial cell migration	non-neuronal lineages
GO:0010976	positive regulation of neuron projection development	neuronal pathways
GO:0045669	positive regulation of osteoblast differentiation	non-neuronal lineages
GO:0014068	positive regulation of phosphatidylinositol 3-kinase cascade	general cellular function
GO:0045944	positive regulation of transcription from RNA polymerase II promoter	general cellular function
GO:0008217	regulation of blood pressure	non-neuronal lineages
GO:0030500	regulation of bone mineralization	non-neuronal lineages
GO:0030334	regulation of cell migration	migration
GO:0042127	regulation of cell proliferation	general cellular function
GO:0050678	regulation of epithelial cell proliferation	non-neuronal lineages
GO:0001666	response to hypoxia	stress pathways
GO:0032496	response to lipopolysaccharide	stress pathways
GO:0009636	response to toxic substance	stress pathways
GO:0007605	sensory perception of sound	neuronal pathways
GO:0001501	skeletal system development	non-neuronal lineages
GO:0043588	skin development	non-neuronal lineages
GO:0035019	somatic stem cell maintenance	non-neuronal lineages
GO:0002040	sprouting angiogenesis	non-neuronal lineages
GO:0042311	vasodilation	non-neuronal lineages
GO:0042060	wound healing	non-neuronal lineages
GO:0006805	xenobiotic metabolic process	stress pathways

## Sheet: 350^550
Supplementary Table S5
up-regulated PS				down-regulated PS
350 ^ 550				350 ^ 550
ID	term	key biological process		ID	term	key biological process
GO:0048812	neuron projection morphogenesis	neuronal pathways		not detected
GO:0071347	cellular response to interleukin-1	general cellular function
GO:0043525	positive regulation of neuron apoptotic process	apoptosis / death
GO:0006979	response to oxidative stress	stress pathways
GO:0001934	positive regulation of protein phosphorylation	general cellular function
GO:0006874	cellular calcium ion homeostasis	stress pathways
GO:0071260	cellular response to mechanical stimulus	stress pathways
GO:0001503	ossification	non-neuronal lineages
GO:0045444	fat cell differentiation	general cellular function
GO:0009888	tissue development	general cellular function

## Sheet: 350^1000
Supplementary Table S5
up-regulated PS				down-regulated PS
350 ^ 1000				350 ^ 1000
ID	term	key biological process		ID	term	key biological process
GO:0016477	cell migration	migration		GO:0007409	axonogenesis	neuronal pathways
GO:0001654	eye development	non-neuronal lineages		GO:0043507	positive regulation of JUN kinase activity	general cellular function
GO:0050679	positive regulation of epithelial cell proliferation	non-neuronal lineages
GO:0019233	sensory perception of pain	neuronal pathways

## Sheet: 550^1000
Supplementary Table S5
up-regulated PS				down-regulated PS
550 ^ 1000				550 ^ 1000
ID	term	key biological process		ID	term	key biological process
GO:0016337	cell-cell adhesion	general cellular function		GO:0007420	brain development	neuronal pathways
GO:0006935	chemotaxis	migration		GO:0048546	digestive tract morphogenesis	non-neuronal lineages
GO:0008585	female gonad development	non-neuronal lineages		GO:0042472	inner ear morphogenesis	non-neuronal lineages
GO:0007611	learning or memory	neuronal pathways		GO:0090090	negative regulation of canonical Wnt receptor signaling pathway	general cellular function
GO:0030595	leukocyte chemotaxis	non-neuronal lineages		GO:0050680	negative regulation of epithelial cell proliferation	non-neuronal lineages
GO:0008584	male gonad development	non-neuronal lineages		GO:0045665	negative regulation of neuron differentiation	neuronal pathways
GO:0001656	metanephros development	non-neuronal lineages		GO:0000122	negative regulation of transcription from RNA polymerase II promoter	general cellular function
GO:0001933	negative regulation of protein phosphorylation	general cellular function		GO:0001841	neural tube formation	neuronal pathways
GO:0032102	negative regulation of response to external stimulus	stress pathways		GO:0001764	neuron migration	migration
GO:0007269	neurotransmitter secretion	neuronal pathways		GO:0003151	outflow tract morphogenesis	non-neuronal lineages
GO:0042475	odontogenesis of dentin-containing tooth	non-neuronal lineages		GO:0090263	positive regulation of canonical Wnt receptor signaling pathway	general cellular function
GO:0048513	organ development	general cellular function		GO:0030307	positive regulation of cell growth	general cellular function
GO:0051099	positive regulation of binding	general cellular function		GO:0045666	positive regulation of neuron differentiation	neuronal pathways
GO:0001938	positive regulation of endothelial cell proliferation	non-neuronal lineages		GO:0045669	positive regulation of osteoblast differentiation	non-neuronal lineages
GO:0070374	positive regulation of ERK1 and ERK2 cascade	general cellular function		GO:0045893	positive regulation of transcription, DNA-dependent	general cellular function
GO:0048146	positive regulation of fibroblast proliferation	non-neuronal lineages		GO:0008589	regulation of smoothened signaling pathway	general cellular function
GO:0050729	positive regulation of inflammatory response	stress pathways		GO:0035019	somatic stem cell maintenance	non-neuronal lineages
GO:0010863	positive regulation of phospholipase C activity	general cellular function		GO:0061053	somite development	non-neuronal lineages
GO:0031623	receptor internalization	general cellular function
GO:0030193	regulation of blood coagulation	non-neuronal lineages
GO:0008360	regulation of cell shape	general cellular function
GO:0008277	regulation of G-protein coupled receptor protein signaling pathway	general cellular function
GO:0090092	regulation of transmembrane receptor protein serine/threonine kinase signaling pathway	general cellular function
GO:0070555	response to interleukin-1	general cellular function
GO:0009615	response to virus	stress pathways
GO:0035282	segmentation	general cellular function
GO:0031295	T cell costimulation	non-neuronal lineages
GO:0048771	tissue remodeling	general cellular function
GO:0035239	tube morphogenesis	stress pathways
GO:0001657	ureteric bud development	non-neuronal lineages

## Sheet: 350
Supplementary Table S5
up-regulated PS				down-regulated PS
350				350
ID	term	key biological process		ID	term	key biological process
GO:0010594	regulation of endothelial cell migration	migration		not detected
GO:0048666	neuron development	neuronal pathways
GO:0009887	organ morphogenesis	general cellular function
GO:0071396	cellular response to lipid	stress pathways
GO:0043406	positive regulation of MAP kinase activity	general cellular function

## Sheet: 550
Supplementary Table S5
up-regulated PS				down-regulated PS
550				550
ID	term	key biological process		ID	term	key biological process
GO:0007204	elevation of cytosolic calcium ion concentration	general cellular function		GO:0035137	hindlimb morphogenesis	non-neuronal lineages
GO:0014070	response to organic cyclic compound	stress pathways		GO:0003208	cardiac ventricle morphogenesis	non-neuronal lineages
GO:0072080	nephron tubule development	non-neuronal lineages		GO:0009880	embryonic pattern specification	general cellular function
GO:0051899	membrane depolarization	general cellular function		GO:0045765	regulation of angiogenesis	non-neuronal lineages
GO:0050680	negative regulation of epithelial cell proliferation	non-neuronal lineages
GO:0017157	regulation of exocytosis	general cellular function
GO:0006094	gluconeogenesis	general cellular function
GO:0002244	hematopoietic progenitor cell differentiation	non-neuronal lineages
GO:0006096	glycolysis	general cellular function

## Sheet: 1000
Supplementary Table S5
up-regulated PS				down-regulated PS
1000				1000
ID	term	key biological process		ID	term	key biological process
GO:0060429	epithelium development	non-neuronal lineages		GO:0007492	endoderm development	non-neuronal lineages
GO:0003206	cardiac chamber morphogenesis	non-neuronal lineages
GO:0030593	neutrophil chemotaxis	migration
GO:0072593	reactive oxygen species metabolic process	stress pathways
GO:0007411	axon guidance	neuronal pathways
GO:0030216	keratinocyte differentiation	non-neuronal lineages
GO:0009791	post-embryonic development	general cellular function
GO:0046777	protein autophosphorylation	general cellular function
GO:0021543	pallium development	non-neuronal lineages
GO:0018108	peptidyl-tyrosine phosphorylation	general cellular function
GO:0032835	glomerulus development	non-neuronal lineages
